# Supplementary material for: Disruption and recovery of outdoor bioaerosols before, during, and after the COVID-19 outbreak at a campus in Central China: pathogen composition, particle size distribution, influencing factors, and exposure risk
Source: Royal Society of Chemistry journal article supplement (doi:10.1039/d3em00496a), 2024-01-01
Supplement: d3em00496a1.pdf [file d3em00496a1.pdf]

**Table A1** Parameter values used in the present exposure assessment.

**Table A2** Genus composition of sampling sites during the three years of the COVID-19.

**Table A3** Specific environmental conditions for sampling at each site. Temperature:

TEM(°C), humidity level: HUM (%), light intensity: LI (Lux), Wind speed: WS (m/s). 2019:

A, 2020: B, 2021: C. North Door (ND), West Door (WD), North playground (NP).

**Table A1** Parameter values used in the present exposure assessment.

| Parameters                                          | Values                                           |
|-----------------------------------------------------|--------------------------------------------------|
| Inhalation rate (IR) (m <sup>3</sup> /d)            | 19.02 (Adult male), 14.17 (Adult female)         |
| Exposure time (ET) (yr)                             | 24                                               |
| Exposure frequency (EF) (d/yr)                      | 180                                              |
| Average body weight (BW) (kg)                       | 66.2 (Adult male), 57.3 (Adult female)           |
| Average time (AT) (d)                               | 73.64×365 (Adult male), 79.43×365 (Adult female) |
| Exposure skin area (SA) (m <sup>2</sup> )           | 0.215                                            |
| Skin adherence factor (SL) (kg/(m <sup>3</sup> /d)) | 0.07                                             |
| Dermal absorption factor (ABS)                      | 0.001                                            |

**Table A2** Genus composition of sampling sites during the three years of the COVID-19.

| genus            | 19ND   | 19NP   | 19WD   | 20ND   | 20NP   | 20WD   | 21ND   | 21NP   | 21WD   |
|------------------|--------|--------|--------|--------|--------|--------|--------|--------|--------|
| Pseudomonas      | 10.41% | 9.01%  | 10.38% | 69.38% | 49.29% | 30.06% | 11.42% | 13.70% | 19.16% |
| Micrococcaceae   | 46.51% | 19.35% | 29.82% | 0.86%  | 1.00%  | 6.10%  | 18.38% | 11.49% | 19.97% |
| Bacillus         | 0.12%  | 0.12%  | 0.06%  | 0.72%  | 2.55%  | 3.99%  | 8.31%  | 26.68% | 19.23% |
| Pantoea          | 0.01%  | 0.05%  | 0.04%  | 2.15%  | 5.43%  | 2.61%  | 7.54%  | 7.79%  | 21.04% |
| Sphingomonas     | 7.99%  | 15.98% | 18.93% | 0.09%  | 0.06%  | 0.07%  | 0.00%  | 0.01%  | 0.00%  |
| Paenarthrobacter | 1.47%  | 20.78% | 0.15%  | 0.29%  | 1.23%  | 5.45%  | 3.72%  | 2.02%  | 2.28%  |
| Exiguobacterium  | 0.02%  | 0.09%  | 0.21%  | 7.06%  | 6.58%  | 7.80%  | 3.39%  | 0.21%  | 0.03%  |
| Chitinophagaceae | 8.21%  | 3.73%  | 7.95%  | 0.01%  | 0.00%  | 0.02%  | 0.00%  | 0.00%  | 0.00%  |
| Stenotrophomonas | 3.30%  | 0.88%  | 0.03%  | 0.02%  | 0.04%  | 2.03%  | 10.64% | 1.57%  | 1.10%  |
| Acinetobacter    | 0.03%  | 0.02%  | 0.09%  | 4.56%  | 1.21%  | 6.88%  | 2.75%  | 2.70%  | 0.16%  |
| Others           | 21.88% | 29.97% | 32.33% | 14.82% | 32.58% | 34.94% | 33.76% | 33.77% | 16.96% |
| Unknown          | 0.04%  | 0.03%  | 0.03%  | 0.04%  | 0.03%  | 0.04%  | 0.09%  | 0.07%  | 0.07%  |



**Table A3** Specific environmental conditions for sampling at each site. Temperature: TEM(°C), humidity level: HUM (%), light intensity: LI (Lux), Wind speed: WS (m/s). 2019: A, 2020: B, 2021: C. North Door (ND), West Door (WD), North playground (NP).

**A1**

| <b>WD</b> | <b>Date</b> | <b>Sampling time</b> | <b>TEM</b> | <b>HUM</b> | <b>LI</b> | <b>WS</b> |
|-----------|-------------|----------------------|------------|------------|-----------|-----------|
|           | March 28th  | 17:18-17:33          | 16         | 35         | 3621      | 3.6       |
|           | March 29th  | 17:27-17:40          | 19         | 36         | 2214      | 2.8       |
|           | March 30th  | 17:20-17:40          | 16.5       | 38         | 1295      | 2.4       |
|           | March 31th  | 17:32-17:49          | 18.2       | 40         | 2935      | 1.5       |
|           | April 1st   | 17:02-17:17          | 20.5       | 33         | 4424      | 1.2       |
|           | April 2nd   | 17:10-17:30          | 19.7       | 34         | 6524      | 3.2       |
|           | April 3rd   | 17:10-17:30          | 21         | 48         | 3023      | 2.7       |
|           | April 4th   | 17:35-17:54          | 22.4       | 34         | 6343      | 2.4       |
|           | April 5th   | 17:34-17:51          | 26.7       | 28         | 2041      | 3.7       |
|           | April 6th   | 17:34-17:51          | 21         | 48         | 1084      | 4         |
|           | April 7th   | 17:31-17:50          | 24         | 35         | 2091      | 2.1       |
|           | April 8th   | 17:32-17:54          | 14         | 58         | 867       | 1.6       |
|           | April 9th   | 17:32-17:51          | 10         | 79         | 935       | 5         |
|           | April 10th  | 17:29-17:50          | 14         | 57         | 676       | 1.2       |
|           | April 11th  | 18:10-18:29          | 21         | 65         | 492       | 2.6       |
|           | April 12th  | 17:26-17:46          | 19.7       | 70         | 2324      | 2.8       |
|           | April 13th  | 17:29-17:47          | 23         | 59         | 321       | 0         |
|           | April 14th  | 17:26-17:44          | 20.5       | 40         | 852       | 2.4       |
|           | April 15th  | 17:08-17:27          | 21.2       | 27         | 1024      | 4.2       |
|           | April 16th  | 17:09-17:28          | 24         | 48         | 4022      | 5.2       |
|           | April 17th  | 18:48-19:04          | 30         | 45         | 109       | 3.8       |
|           | April 18th  | 17:27-17:40          | 26         | 44         | 5935      | 6.5       |
|           | April 19th  | 17:20-17:40          | 18.2       | 34         | 4476      | 5.2       |
|           | April 20th  | 17:32-17:49          | 24.1       | 37         | 9234      | 2.8       |
|           | April 21st  | 17:02-17:17          | 16.5       | 89         | 2324      | 3.4       |
|           | April 22nd  | 17:10-17:30          | 14.5       | 90         | 102       | 1.2       |
|           | April 23rd  | 17:10-17:30          | 24.5       | 54         | 2451      | 2.5       |

A2

| ND | Date       | Sampling time | TEM  | HUM | LI    | WS  |
|----|------------|---------------|------|-----|-------|-----|
|    | March 28th | 15:37-15:55   | 18   | 35  | 1037  | 4.5 |
|    | March 29th | 15:29-15:44   | 18.4 | 36  | 8625  | 2.4 |
|    | March 30th | 15:32-15:51   | 15.5 | 38  | 1463  | 2.8 |
|    | March 31th | 15:35-15:56   | 16.4 | 40  | 4212  | 1.4 |
|    | April 1st  | 15:35-15:56   | 20   | 33  | 7035  | 1.3 |
|    | April 2nd  | 15:55-16:16   | 21   | 34  | 1265  | 3.7 |
|    | April 3rd  | 15:40-16:00   | 20.1 | 48  | 1893  | 2.4 |
|    | April 4th  | 15:52-16:14   | 23.2 | 34  | 4212  | 2.8 |
|    | April 5th  | 15:32-15:50   | 26.8 | 28  | 5232  | 3   |
|    | April 6th  | 15:31-15:49   | 22.1 | 48  | 1962  | 4.2 |
|    | April 7th  | 15:33-15:48   | 22.6 | 35  | 1925  | 2.1 |
|    | April 8th  | 15:37-15:55   | 15   | 58  | 1882  | 1.8 |
|    | April 9th  | 15:52-16:07   | 10   | 79  | 532   | 6.8 |
|    | April 10th | 15:40-16:00   | 13.6 | 57  | 3432  | 1.4 |
|    | April 11th | 15:32-15:48   | 20.5 | 65  | 7129  | 2.4 |
|    | April 12th | 15:30-15:44   | 21.7 | 70  | 6243  | 2.5 |
|    | April 13th | 15:29-15:44   | 20.4 | 59  | 67600 | 0   |
|    | April 14th | 15:34-15:51   | 22.5 | 40  | 1988  | 2.3 |
|    | April 15th | 15:32-15:51   | 20   | 27  | 24850 | 4.3 |
|    | April 16th | 15:35-15:56   | 22.3 | 48  | 16990 | 5.2 |
|    | April 17th | 15:30-15:49   | 38.5 | 45  | 23212 | 3.5 |
|    | April 18th | 15:24-15:40   | 25.1 | 44  | 23670 | 8   |
|    | April 19th | 15:37-15:53   | 16   | 34  | 18580 | 6,4 |
|    | April 20th | 15:32-15:49   | 23.1 | 37  | 44900 | 2.4 |
|    | April 21st | 15:32-15:48   | 16   | 89  | 12455 | 3.1 |
|    | April 22nd | 15:10-15:31   | 16.4 | 90  | 24524 | 1   |
|    | April 23rd | 15:28-15:45   | 24   | 54  | 42142 | 2.2 |

A3

| NP | Date       | Sampling time | TEM  | HUM | LI    | WS  |
|----|------------|---------------|------|-----|-------|-----|
|    | March 28th | 16:12-16:30   | 15   | 35  | 2999  | 4.2 |
|    | March 29th | 16:07-16:24   | 18.2 | 36  | 2820  | 2.4 |
|    | March 30th | 15:54-16:09   | 15.5 | 38  | 1037  | 2   |
|    | March 31th | 15:57-16:12   | 18   | 40  | 4321  | 1.4 |
|    | April 1st  | 16:07-16:24   | 21   | 33  | 4520  | 1.2 |
|    | April 2nd  | 16:02-16:21   | 20.8 | 34  | 6253  | 3.6 |
|    | April 3rd  | 16:03-16:22   | 22   | 48  | 2463  | 2.2 |
|    | April 4th  | 16:04-16:25   | 24.2 | 34  | 5343  | 2.5 |
|    | April 5th  | 16:00-16:21   | 27.8 | 28  | 12241 | 3.5 |
|    | April 6th  | 16:50-17:04   | 22.6 | 48  | 7832  | 4.6 |
|    | April 7th  | 16:00-16:19   | 25.1 | 35  | 35480 | 2.5 |
|    | April 8th  | 16:00-16:16   | 16.7 | 58  | 8140  | 1.6 |
|    | April 9th  | 16:00-16:16   | 10   | 79  | 680   | 7.5 |
|    | April 10th | 15:40-15:57   | 14   | 57  | 540   | 1.2 |
|    | April 11th | 15:49-16:06   | 20.4 | 65  | 3975  | 2.5 |
|    | April 12th | 16:00-16:15   | 21   | 70  | 1079  | 2.3 |
|    | April 13th | 15:57-16:12   | 23   | 59  | 21220 | 0   |
|    | April 14th | 16:02-16:21   | 20.8 | 40  | 33570 | 2.4 |
|    | April 15th | 16:12-16:30   | 22   | 27  | 14270 | 4.7 |
|    | April 16th | 16:07-16:24   | 26.1 | 48  | 20480 | 5.2 |
|    | April 17th | 15:54-16:09   | 30   | 45  | 9600  | 3.7 |
|    | April 18th | 15:57-16:12   | 26.2 | 44  | 52430 | 9   |
|    | April 19th | 16:00-16:15   | 16   | 34  | 12241 | 7.2 |
|    | April 20th | 15:57-16:12   | 25.5 | 37  | 42480 | 2.1 |
|    | April 21st | 16:00-16:20   | 17   | 89  | 35480 | 3.5 |
|    | April 22nd | 16:12-16:30   | 19   | 90  | 24552 | 1.5 |
|    | April 23rd | 16:07-16:24   | 24.6 | 54  | 12341 | 2.5 |

**B1**

| <b>WD</b> | <b>Date</b> | <b>Sampling time</b> | <b>TEM</b> | <b>HUM</b> | <b>LI</b> | <b>WS</b> |
|-----------|-------------|----------------------|------------|------------|-----------|-----------|
|           | June 24th   | 18:00-18:25          | 30         | 58         | 2311      | 0         |
|           | June 25th   | 18:10-18:37          | 32         | 47         | 234       | 1.5       |
|           | June 26th   | 19:25-19:53          | 28.4       | 74.4       | 336       | 0         |
|           | June 27th   | 17:35-18:00          | 30         | 66.1       | 3652      | 0.5       |
|           | June 28th   | 19:20-19:37          | 26.9       | 38         | 296       | 0         |
|           | June 29th   | 19:30-19:48          | 19.6       | 78         | 168       | 3         |
|           | June 30th   | 20:15-20:32          | 27.3       | 65.4       | 1         | 0.6       |
|           | July 1st    | 18:55-19:14          | 28.4       | 34         | 1203      | 0.9       |
|           | July 2nd    | 17:17-17:34          | 29         | 48         | 21340     | 1.8       |
|           | July 3rd    | 18:48-19:05          | 28         | 34         | 1864      | 0.6       |
|           | July 4th    | 18:58-19:25          | 19.1       | 68         | 1698      | 2.5       |
|           | July 5th    | 19:02-19:20          | 29.7       | 48         | 2339      | 0         |
|           | July 6th    | 18:54-19:10          | 32.6       | 35         | 2584      | 1.2       |
|           | July 7th    | 18:45-19:03          | 32.8       | 58         | 3212      | 0.7       |
|           | July 8th    | 19:22-19:40          | 26.4       | 79         | 89        | 0         |
|           | July 9th    | 18:48-19:08          | 29.4       | 57         | 2034      | 0.8       |
|           | July 10th   | 18:37-18:55          | 28.2       | 65         | 689       | 0         |
|           | July 11th   | 18:41-19:02          | 22.1       | 70         | 423       | 2.5       |
|           | July 12th   | 18:30-18:50          | 24.5       | 59         | 1864      | 1.9       |
|           | July 13th   | 18:49-19:07          | 27.1       | 40         | 3174      | 0         |
|           | July 14th   | 18:45-19:07          | 25.4       | 27         | 1759      | 0         |
|           | July 15th   | 19:00-19:13          | 27.6       | 48         | 1864      | 1.6       |
|           | July 16th   | 19:13-19:36          | 27.1       | 45         | 545       | 1.3       |
|           | July 17th   | 19:10-19:27          | 25.6       | 44         | 795       | 0         |
|           | July 18th   | 19:03-19:20          | 25         | 34         | 564       | 0         |
|           | July 19th   | 19:25-19:40          | 26.4       | 37         | 419       | 0         |
|           | July 20th   | 19:17-19:34          | 28.4       | 89         | 521       | 2.6       |
|           | July 21st   | 19:07-19:24          | 19.4       | 79         | 685       | 1.4       |
|           | July 22nd   | 18:42-19:00          | 25.1       | 54         | 1464      | 0         |



**B2**

| <b>ND</b> | <b>Date</b> | <b>Sampling time</b> | <b>TEM</b> | <b>HUM</b> | <b>LI</b> | <b>WS</b> |
|-----------|-------------|----------------------|------------|------------|-----------|-----------|
|           | June 24th   | 18:32-18:55          | 20         | 42.6       | 270       | 0.5       |
|           | June 25th   | 19:31-19:49          | 21.7       | 37.3       | 580       | 1         |
|           | June 26th   | 20:35-21:00          | 28         | 76         | 3267      | 0         |
|           | June 27th   | 18:36-18:55          | 31.6       | 60.5       | 2249      | 0         |
|           | June 28th   | 20:11-20:23          | 26.8       | 71         | 324       | 0.6       |
|           | June 29th   | 20:01-20:20          | 19.6       | 75         | 29        | 1.6       |
|           | June 30th   | 21:15-21:27          | 26.4       | 64.1       | 22        | 0         |
|           | July 1st    | 19:48-20:05          | 29         | 56.5       | 92        | 1         |
|           | July 2nd    | 18:05-18:23          | 30.2       | 61.9       | 13865     | 0         |
|           | July 3rd    | 19:43-20:03          | 28.4       | 63.5       | 96        | 0         |
|           | July 4th    | 19:23-19:42          | 19.6       | 76         | 103       | 2.1       |
|           | July 5th    | 19:48-20:07          | 29.6       | 63.8       | 86        | 0         |
|           | July 6th    | 19:42-20:00          | 33.6       | 47.3       | 146       | 0.8       |
|           | July 7th    | 19:35-19:52          | 33.6       | 51.6       | 421       | 3.2       |
|           | July 8th    | 20:13-20:30          | 26.5       | 86.1       | 70        | 0         |
|           | July 9th    | 19:40-20:00          | 29         | 65.4       | 126       | 1.9       |
|           | July 10th   | 19:29-19:45          | 29         | 68.9       | 189       | 1         |
|           | July 11th   | 19:46-20:05          | 18.4       | 78         | 201       | 2.2       |
|           | July 12th   | 19:28-19:43          | 23.8       | 74.8       | 523       | 0         |
|           | July 13th   | 19:41-19:56          | 27.6       | 62.6       | 196       | 0.3       |
|           | July 14th   | 19:41-19:57          | 24.4       | 86.3       | 192       | 0         |
|           | July 15th   | 19:45-19:58          | 28.5       | 62.4       | 188       | 3.2       |
|           | July 16th   | 20:08-20:15          | 28         | 62.5       | 31        | 0         |
|           | July 17th   | 20:03-20:12          | 24.3       | 77.5       | 40        | 0.5       |
|           | July 18th   | 19:46-20:00          | 27.6       | 67.8       | 18        | 0         |
|           | July 19th   | 20:10-20:38          | 24.2       | 90         | 12        | 0         |
|           | July 20th   | 20:02-20:20          | 30.4       | 55.7       | 14        | 2.4       |
|           | July 21st   | 20:00-20:19          | 20.1       | 69         | 108       | 3         |
|           | July 22nd   | 19:25-19:40          | 24.7       | 82.9       | 252       | 0         |

**B3**

| <b>NP</b> | <b>Date</b> | <b>Sampling time</b> | <b>TEM</b> | <b>HUM</b> | <b>LI</b> | <b>WS</b> |
|-----------|-------------|----------------------|------------|------------|-----------|-----------|
|           | June 24th   | 19:52-20:16          | 20.4       | 42.6       | 670       | 0.8       |
|           | June 25th   | 19:55-20:25          | 22         | 37.3       | 320       | 1.4       |
|           | June 26th   | 20:05-20:30          | 27.8       | 75.1       | 13        | 0         |
|           | June 27th   | 18:05-18:28          | 31.2       | 62         | 6277      | 1.2       |
|           | June 28th   | 19:48-20:02          | 27.1       | 69.7       | 89        | 0.6       |
|           | June 29th   | 18:00-18:20          | 19.8       | 70.9       | 303       | 2.8       |
|           | June 30th   | 20:46-21:10          | 26.4       | 66.6       | 21        | 0         |
|           | July 1st    | 19:25-19:42          | 29         | 54.9       | 786       | 2.5       |
|           | July 2nd    | 17:44-17:56          | 30.2       | 60.2       | 20780     | 2.6       |
|           | July 3rd    | 19:19-19:36          | 28         | 64         | 1223      | 0         |
|           | July 4th    | 19:30-19:46          | 17.9       | 88         | 206       | 3.3       |
|           | July 5th    | 19:28-19:45          | 30.2       | 60.9       | 764       | 0         |
|           | July 6th    | 19:18-19:38          | 32.7       | 49.1       | 1874      | 1.9       |
|           | July 7th    | 19:10-19:28          | 32.9       | 53.3       | 2391      | 2.3       |
|           | July 8th    | 19:50-20:07          | 26.5       | 89.1       | 14        | 0         |
|           | July 9th    | 19:18-19:36          | 29.7       | 66.4       | 1467      | 1.4       |
|           | July 10th   | 19:05-19:24          | 28.9       | 70.8       | 732       | 0.6       |
|           | July 11th   | 19:16-19:33          | 20.6       | 71.5       | 1986      | 2.5       |
|           | July 12th   | 19:01-19:20          | 24.3       | 71.8       | 4345      | 1.2       |
|           | July 13th   | 19:16-19:33          | 27.7       | 60.7       | 1435      | 0         |
|           | July 14th   | 15:10-15:31          | 25.2       | 80.8       | 1261      | 0         |
|           | July 15th   | 19:21-19:37          | 28.4       | 62.8       | 1421      | 2.2       |
|           | July 16th   | 19:40-20:02          | 28.1       | 61.9       | 121       | 0.9       |
|           | July 17th   | 19:36-19:56          | 24.4       | 77.7       | 276       | 0.4       |
|           | July 18th   | 19:25-19:40          | 26.4       | 71.7       | 184       | 0.7       |
|           | July 19th   | 19:49-20:03          | 24.9       | 87.8       | 47        | 0         |
|           | July 20th   | 19:41-19:58          | 29.9       | 53.9       | 87        | 2.6       |
|           | July 21st   | 19:41-19:58          | 20         | 88.1       | 43        | 2.9       |
|           | July 22nd   | 19:08-19:22          | 24.7       | 81.3       | 1159      | 0         |

## C1

| <b>WD</b>  | <b>Date</b> | <b>Sampling time</b> | <b>TEM</b> | <b>HUM</b> | <b>LI</b> | <b>WS</b> |
|------------|-------------|----------------------|------------|------------|-----------|-----------|
| April 15th |             | 17:26-18:00          | 19.3       | 47.9       | 19870     | 0.3       |
| April 16th |             | 17:27-17:47          | 21.2       | 37.6       | 5935      | 0.7       |
| April 17th |             | 17:18-17:33          | 20.3       | 37.6       | 4476      | 0.6       |
| April 18th |             | 17:27-17:40          | 22.2       | 26.7       | 9492      | 0.8       |
| April 19th |             | 17:20-17:40          | 18.7       | 56.3       | 2324      | 0.2       |
| April 20th |             | 17:32-17:49          | 25.5       | 39.5       | 10810     | 0.2       |
| April 21st |             | 17:02-17:17          | 19.9       | 37         | 2918      | 0.4       |
| April 22nd |             | 17:10-17:30          | 22.6       | 29.1       | 10840     | 1.5       |
| April 23rd |             | 17:10-17:30          | 24.3       | 36.9       | 5249      | 1.6       |
| April 24th |             | 17:35-17:54          | 25.8       | 15.3       | 10610     | 3.7       |
| April 25th |             | 17:34-17:51          | 24.1       | 80         | 525       | 4         |
| April 26th |             | 17:34-17:51          | 23         | 26         | 9410      | 5.4       |
| April 27th |             | 17:31-17:50          | 21.8       | 56.8       | 16720     | 2.2       |
| April 28th |             | 17:32-17:54          | 19.8       | 64.2       | 2389      | 0.9       |
| April 29th |             | 17:32-17:51          | 23.5       | 50.7       | 15120     | 0.7       |
| April 30th |             | 17:29-17:50          | 27.4       | 24         | 27330     | 1.9       |
| May 1st    |             | 18:10-18:29          | 24.9       | 20.5       | 3160      | 2.6       |
| May 2nd    |             | 17:26-17:46          | 27.6       | 13.1       | 20970     | 5.7       |
| May 3rd    |             | 17:29-17:47          | 23.8       | 40.2       | 7865      | 2.9       |
| May 4th    |             | 17:26-17:44          | 22.3       | 29.5       | 2847      | 0.4       |

## C2

| <b>ND</b> | <b>Date</b> | <b>Sampling time</b> | <b>TEM</b> | <b>HUM</b> | <b>LI</b> | <b>WS</b> |
|-----------|-------------|----------------------|------------|------------|-----------|-----------|
|           | April 15th  | 15:32-15:50          | 20.4       | 42.6       | 23670     | 0.9       |
|           | April 16th  | 15:31-15:49          | 21.7       | 37.3       | 18580     | 1         |
|           | April 17th  | 15:33-15:48          | 20.3       | 34.8       | 44900     | 1.9       |
|           | April 18th  | 15:37-15:55          | 22         | 23.3       | 47380     | 4         |
|           | April 19th  | 15:52-16:07          | 18.3       | 56.5       | 9785      | 0.4       |
|           | April 20th  | 15:40-16:00          | 27.1       | 34.6       | 78810     | 0.4       |
|           | April 21st  | 15:32-15:48          | 20.5       | 34.1       | 70510     | 1.9       |
|           | April 22nd  | 15:30-15:44          | 22.1       | 28.7       | 64660     | 1.2       |
|           | April 23rd  | 15:29-15:44          | 21.9       | 45.3       | 34320     | 2.1       |
|           | April 24th  | 15:32-15:51          | 27.6       | 14.1       | 71290     | 2.4       |
|           | April 25th  | 15:35-15:56          | 22.9       | 20         | 6243      | 1.5       |
|           | April 26th  | 15:42-15:59          | 23.8       | 24.9       | 67600     | 2.4       |
|           | April 27th  | 15:34-15:51          | 21.3       | 58.4       | 19880     | 1.3       |
|           | April 28th  | 15:32-15:51          | 20.6       | 62.1       | 24850     | 1.6       |
|           | April 29th  | 15:35-15:56          | 22         | 56.1       | 16990     | 0.2       |
|           | April 30th  | 15:30-15:49          | 24         | 29.1       | 10620     | 1.2       |
|           | May 1st     | 15:24-15:40          | 26.5       | 18         | 108900    | 2.4       |
|           | May 2nd     | 15:37-15:53          | 28.7       | 14         | 114200    | 5.6       |
|           | May 3rd     | 15:32-15:49          | 29.7       | 20.2       | 207300    | 7.1       |
|           | May 4th     | 15:32-15:48          | 22.7       | 32.7       | 64670     | 2.1       |

**C3**

| <b>NP</b> | <b>Date</b> | <b>Sampling time</b> | <b>TEM</b> | <b>HUM</b> | <b>LI</b> | <b>WS</b> |
|-----------|-------------|----------------------|------------|------------|-----------|-----------|
|           | April 15th  | 16:02-16:20          | 21.7       | 39.2       | 28420     | 1.5       |
|           | April 16th  | 16:00-16:15          | 25.1       | 30.9       | 12700     | 1.4       |
|           | April 17th  | 15:57-16:12          | 22         | 30.2       | 29990     | 3.2       |
|           | April 18th  | 16:00-16:20          | 24.3       | 22.7       | 28110     | 1.2       |
|           | April 19th  | 16:12-16:30          | 18         | 57.7       | 10370     | 1.1       |
|           | April 20th  | 16:07-16:24          | 29         | 31.6       | 43680     | 0.6       |
|           | April 21st  | 15:54-16:09          | 21.8       | 33.2       | 48200     | 2.2       |
|           | April 22nd  | 15:57-16:12          | 26.3       | 25.8       | 62770     | 2.6       |
|           | April 23rd  | 15:52-16:09          | 26         | 36.2       | 24630     | 4         |
|           | April 24th  | 16:00-16:18          | 29.9       | 12         | 53430     | 3.5       |
|           | April 25th  | 16:05-16:23          | 19.2       | 22         | 12241     | 4.2       |
|           | April 26th  | 16:07-16:24          | 23.5       | 25.2       | 62480     | 5.1       |
|           | April 27th  | 16:02-16:21          | 21.7       | 61.5       | 35480     | 2.5       |
|           | April 28th  | 16:03-16:22          | 20.4       | 65.3       | 11840     | 1.9       |
|           | April 29th  | 16:04-16:25          | 23.6       | 53.4       | 69680     | 2.4       |
|           | April 30th  | 16:00-16:21          | 26.2       | 23.6       | 80240     | 2.6       |
|           | May 1st     | 16:50-17:04          | 24.4       | 21.3       | 39750     | 6.2       |
|           | May 2nd     | 16:00-16:19          | 29.1       | 13.4       | 107900    | 6.4       |
|           | May 3rd     | 16:00-16:16          | 30.2       | 19.6       | 212200    | 7.6       |
|           | May 4th     | 16:00-16:16          | 23.9       | 25.4       | 33570     | 0.6       |

## **A1 bacterial solution sample pre-processing steps.**

1. Transfer the collected liquid to a centrifuge tube, add 500  $\mu$ l of Buffer SA, 100  $\mu$ l of Buffer SC and 0.25 g of grinding beads, mix by vortexing or tissue homogenizer, and then heat lysis at 70°C for 15 min to improve lysis efficiency. 12,000 rpm ( $\sim$ 13,400 $\times$ g) centrifuge for 1 min, transfer the supernatant (about 500  $\mu$ l) to a new 2 ml centrifuge tube.
2. Add 200  $\mu$ l of Buffer SH, mix well, vortex for 5 sec, and allow to stand at 4°C for 10 min.
3. Centrifuge at 12,000 rpm ( $\sim$ 13,400 x g) for 3 min, transfer the supernatant to a new 2 ml centrifuge tube, add 500  $\mu$ l of Buffer GFA (check that isopropanol has been added before use), and mix upside down.
4. Add 10  $\mu$ l of Magnetic Bead Suspension G and mix with shaking for 5 min.
5. Place the centrifuge tube on a magnetic rack and let it stand for 30 sec. After the magnetic beads are fully adsorbed, carefully aspirate the liquid.
6. Remove the centrifuge tube from the magnetic rack, add 700  $\mu$ l of Deproteinizing Solution RD (check that anhydrous alcohol has been added before use) and mix for 5 min with shaking.
7. Place the centrifuge tube on a magnetic rack and let it stand for 30 sec. After the magnetic beads are fully adsorbed, carefully aspirate the liquid.
8. Remove the tube from the magnetic rack, add 700  $\mu$ l of Rinse Solution PWD (check that anhydrous ethanol has been added before use) and mix for 3 min with shaking.
9. Place the centrifuge tube on a magnetic rack and let it stand for 30 sec. After the magnetic beads are fully adsorbed, carefully aspirate the liquid.
10. Repeat steps 8 and 9 once.
11. Place the tubes on a magnetic rack and allow to air dry at room temperature for 5-10 min. Note: Ethanol residue can inhibit subsequent enzymatic reactions, so make sure that the ethanol evaporates during air drying. However, do not dry the tubes for too long as it may be difficult to elute the DNA.
12. Remove the centrifuge tube from the magnetic rack, add 50-100  $\mu$ l of Elution

Buffer TB, mix with shaking, place at 56°C, and incubate for 5 min, during which time mix with shaking 3 times, 3-5 times each.

13. Place the centrifuge tube on a magnetic rack for 2 min. After the magnetic beads are fully adsorbed, carefully transfer the DNA solution to a new centrifuge tube and store under appropriate conditions.
